# Supplementary material for: Dwindling the re-stacking by simultaneous exfoliation of boron nitride and decoration of α-Fe2O3nanoparticles using a solvothermal route
Source: Royal Society of Chemistry journal article supplement (doi:10.1039/c7nj04325b), 2018-01-01
Supplement: c7nj04325b1.pdf [file c7nj04325b1.pdf]

## Supporting Information

### **Dwindling the Re-stacking by Simultaneous Exfoliation of Boron Nitride and Decoration of $\alpha$ -Fe<sub>2</sub>O<sub>3</sub> Nanoparticles using Solvothermal Route**

Pitchai Thangasamy<sup>a,b</sup> and Marappan Sathish<sup>a,b\*</sup>

<sup>a</sup>Academy of Scientific and Innovative Research, Karaikudi-630 003, Tamil Nadu, India.

<sup>b</sup>Functional Materials Division, CSIR-Central Electrochemical Research Institute, Karaikudi-630 003, Tamil Nadu, India.

\*Corresponding author: [marappan.sathish@gmail.com](mailto:marappan.sathish@gmail.com) and [msathish@cecri.res.in](mailto:msathish@cecri.res.in)

### Structural characterization:

The formation of  $\alpha$ -Fe<sub>2</sub>O<sub>3</sub> and BN-Fe<sub>2</sub>O<sub>3</sub> composite was primarily characterized by XRD analysis. XRD patterns were recorded using BRUKER D8 ADVANCE X-ray Diffractometer with Cu K $\alpha$  radiation ( $\lambda = 1.5418 \text{ \AA}$ ) from 10-80° at 0.02° step and a count time of 0.2s. FT-IR and Raman analysis was performed using TENSOR 27 spectrometer (Bruker) and laser Raman system (RENISHAW Invia laser Raman microscope) with He-Ne laser (wavelength  $\lambda = 633 \text{ nm}$ ), respectively. Diffuse reflectance spectra (DRS) was carried out using a UV-VIS-NIR double beam spectrophotometer (VARIAN, Cary 5000) equipped with a diffuse reflectance attachment. The decoration of  $\alpha$ -Fe<sub>2</sub>O<sub>3</sub> nanoparticles over E-BN nanosheets were evaluated by scanning electron microscopy (SEM) and high resolution transmission electron microscopy (HR-TEM) analysis. SEM and HR-TEM images were taken at different locations/magnifications using Hitachi S-3000H (Japan) with an accelerating voltage of 0.3–30 kV and Tecnai G<sup>2</sup> 20 working at an accelerating voltage of 200 kV, respectively.

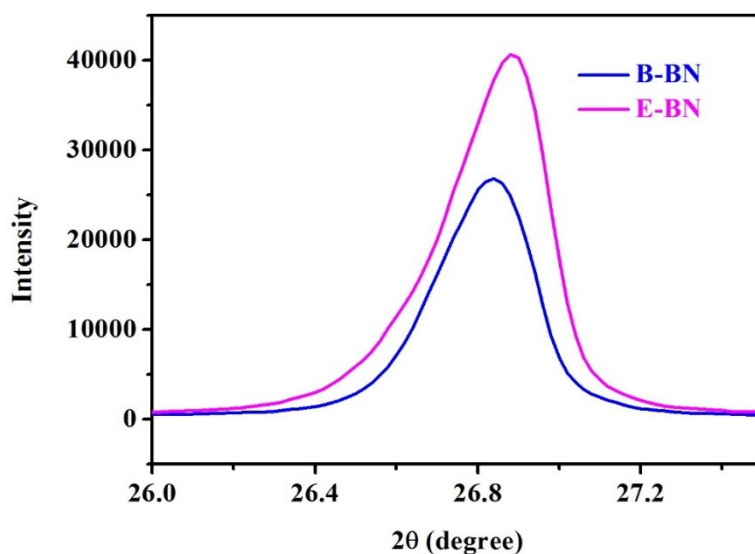

**Fig. S1** Enlarged XRD patterns of B-BN and E-BN.

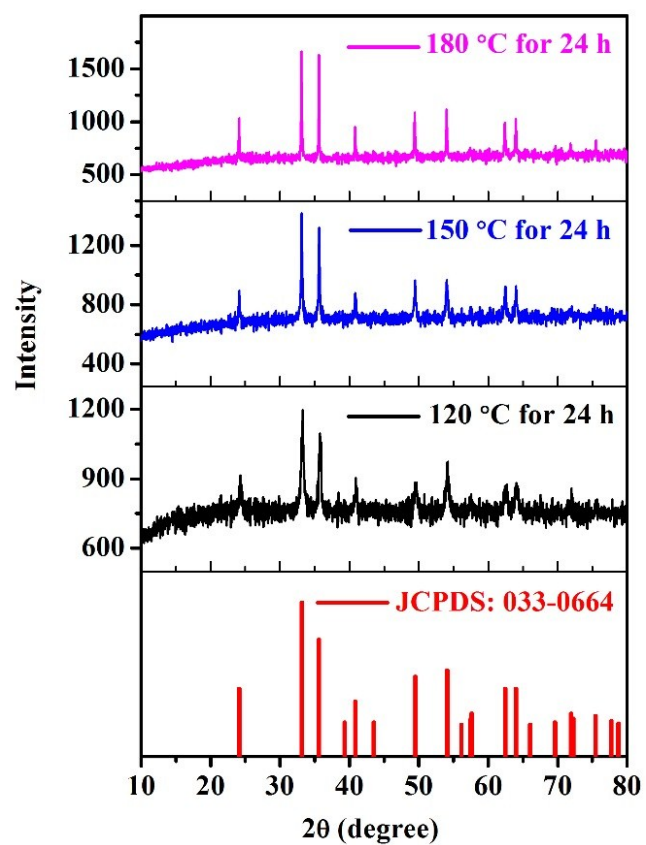

**Fig. S2** XRD patterns of  $\alpha$ -Fe<sub>2</sub>O<sub>3</sub> nanoparticles obtained by different reaction temperatures and the standard reference pattern of  $\alpha$ -Fe<sub>2</sub>O<sub>3</sub>.

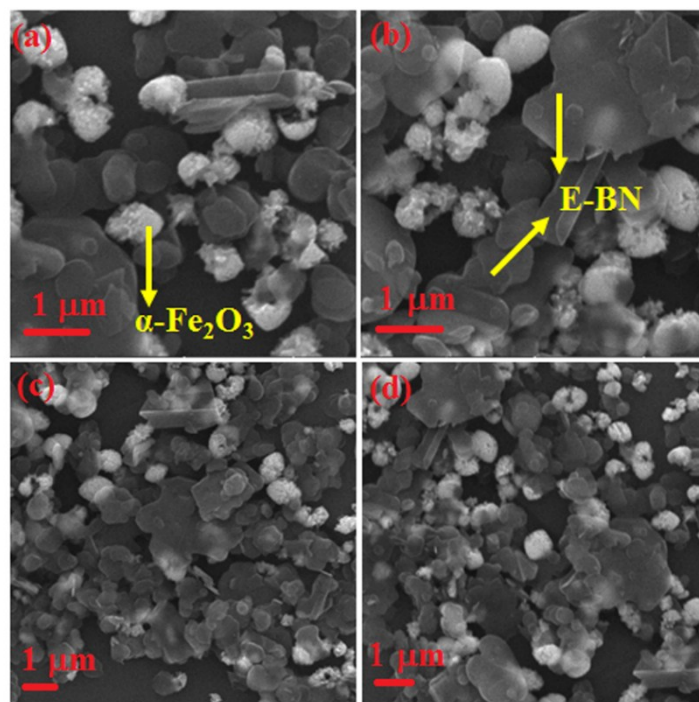

**Fig. S3** SEM images of BN-Fe<sub>2</sub>O<sub>3</sub> composite (1:1 wt%).

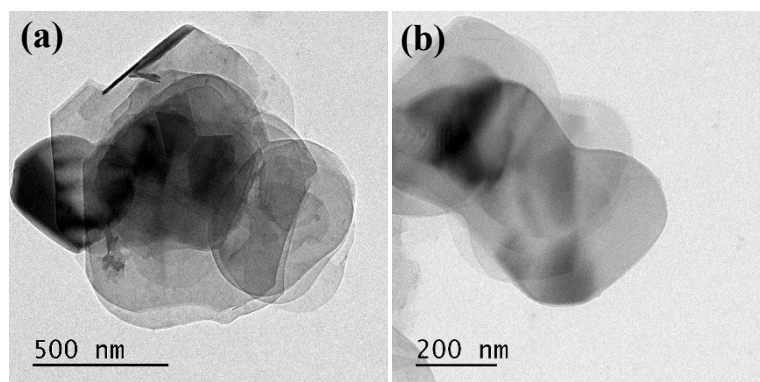

**Fig. S4** HR-TEM images of E-BN nanosheets at different magnifications.

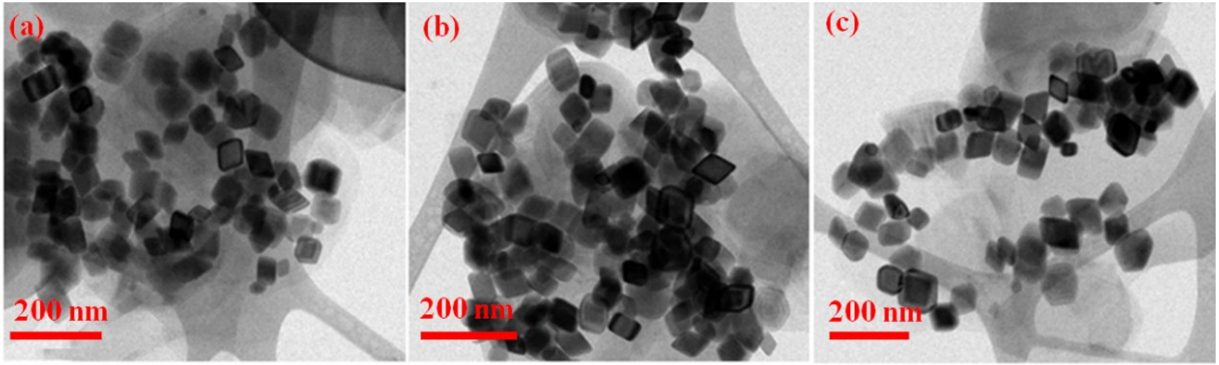

**Fig. S5** HR-TEM images of BN-Fe<sub>2</sub>O<sub>3</sub> composite.

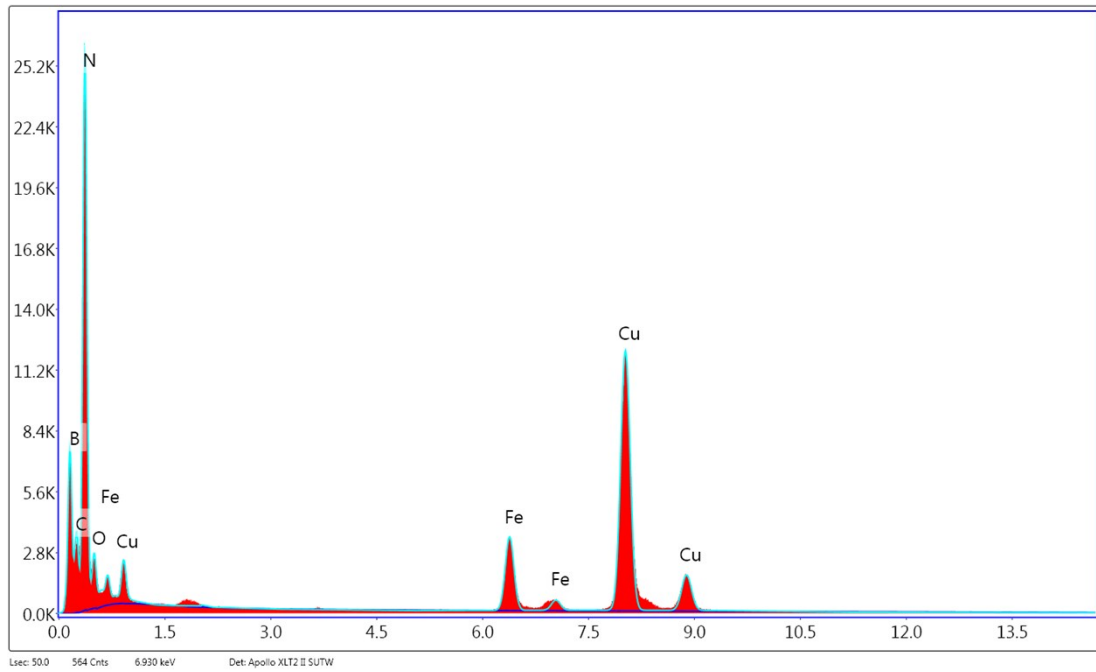

**Fig. S6** TEM-EDX analysis of BN-Fe<sub>2</sub>O<sub>3</sub> composite.

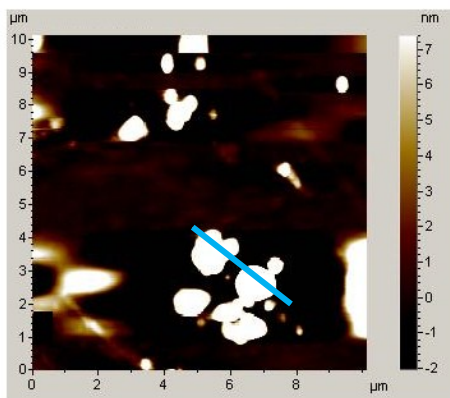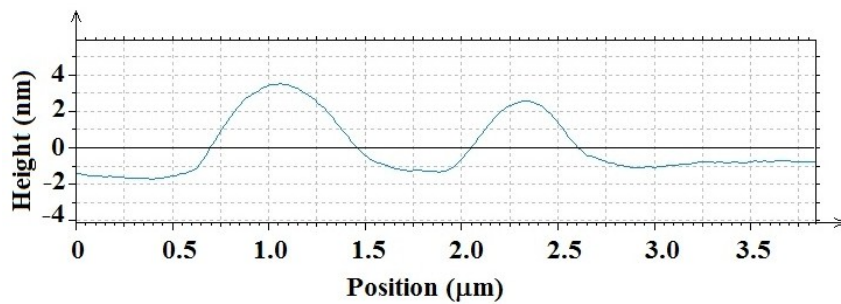

**Fig. S7** AFM image of E-BN nanosheets.
